# Supplementary material for: How Many Orai's Does It Take to Make a CRAC Channel?
Source: PubMed Central journal article supplement — Sci Rep. 2013 Jun 7;3:1961. doi: 10.1038/srep01961 (PMC3675454; doi:10.1038/srep01961), 2013-06-07

## **SUPPLEMENTAL INFORMATION -**

### **TITLE**

**How Many Orai's Does It Take to Make a CRAC Channel?**

### **AUTHORS**

**Jill L. Thompson and Trevor J. Shuttleworth\***

## Supplemental Figure 1

Representative trace showing the activation of  $\text{La}^{3+}$ -sensitive store-operated currents in a HEK cell stably expressing STIM1 and transfected with the concatenated Orai1 hexamer construct. Inward currents measured at -80 mV were progressively activated on achieving whole-cell patch clamp conditions by inclusion of adenophostin A (2  $\mu\text{M}$ ) in the pipette solution. Gaps in the trace reflect the times during which current-voltage relationships were recorded.

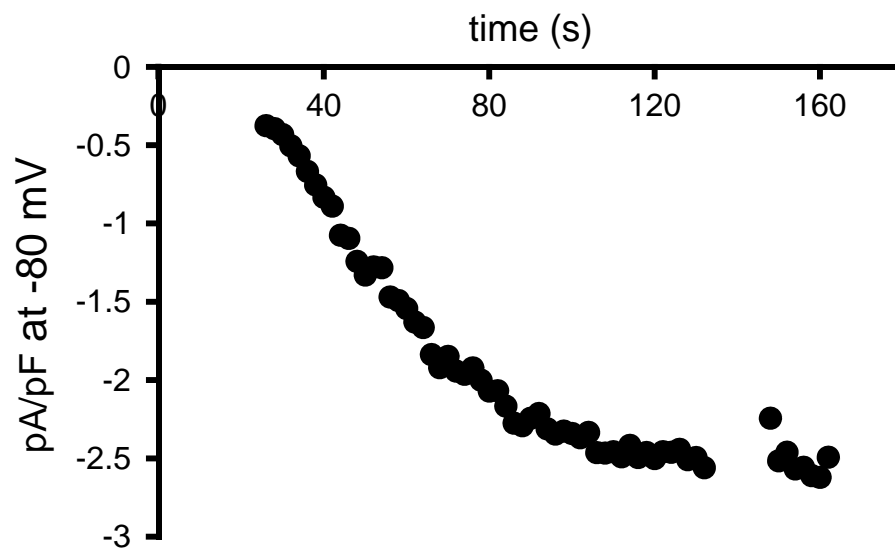

## Supplemental Figure 2

Comparison of the mean ( $\pm$  SE) I/V curves for store-operated currents recorded between -100 mV and +80 mV in STIM1-stable cells expressing the concatenated Orai1 hexamer (black symbols,  $n = 6$  – data taken from Fig. 1a) and in the same cells transfected with additional STIM1 (white symbols,  $n = 5$ ). The external medium was the standard  $\text{Na}^+/\text{Ca}^{2+}$  solution (140 mM  $\text{Na}^+$  and 10 mM  $\text{Ca}^{2+}$ ).

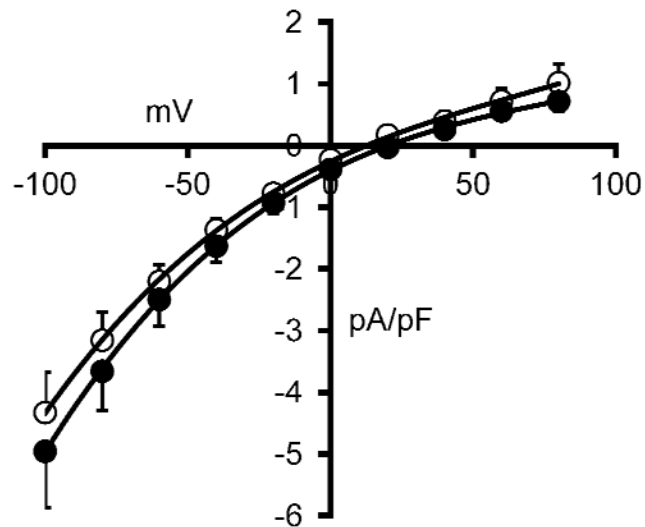

### Supplemental Figure 3

Representative traces showing the minimal calcium-dependent fast-inactivation (CDI) displayed in cells expressing the concatenated Orai hexamer construct.

Store-operated currents ( $2\ \mu\text{M}$  adenophostin A in the pipette) were measured in cells in a sodium-free external solution containing 110 mM calcium (solution

composition, in mM: 110  $\text{CaCl}_2$ , 10 glucose, 1.2  $\text{MgCl}_2$ , 10 Hepes, pH 7.4). Once

maximal activation was achieved, inward currents were measured at a frequency of 5 kHz during 280 ms pulses to  $-120\ \text{mV}$  from the holding potential of 0 mV

applied every 2 seconds. All recordings were low-pass filtered with a 1-kHz Bessel filter.

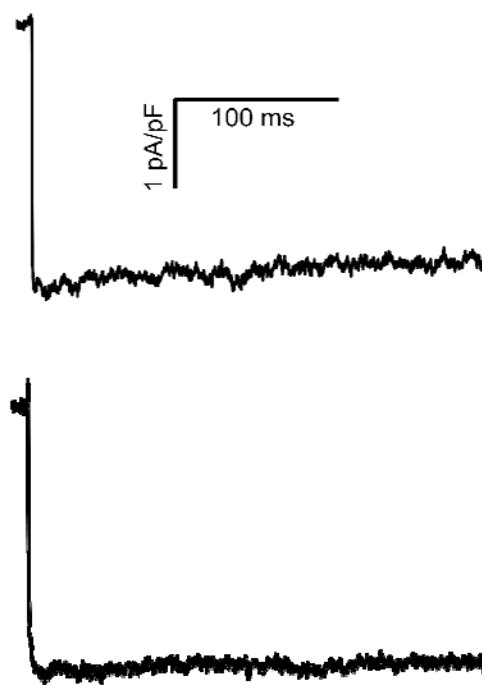

Supplement: srep01961-s1.pdf [file srep01961-s1.pdf]
